# Supplementary material for: Reduced Cerebellar Volume in Term Infants with Complex Congenital Heart Disease: Correlation with Postnatal Growth Measurements
Source: MDPI journal article supplement (doi:10.3390/diagnostics12071644), 2022-07-06
Supplement: s1 [file s1]

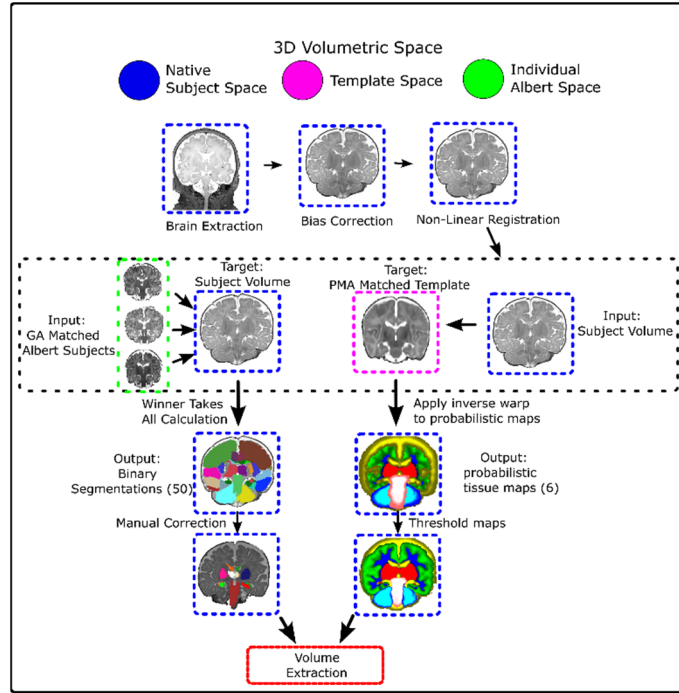

**Figure S1.** Semi-automated structural segmentation. We developed an automated structure segmentation pipeline (with a final manual correction step) that efficiently delineates 50 structures in native subject space. The only input required is a T2 weighted structural MRI.

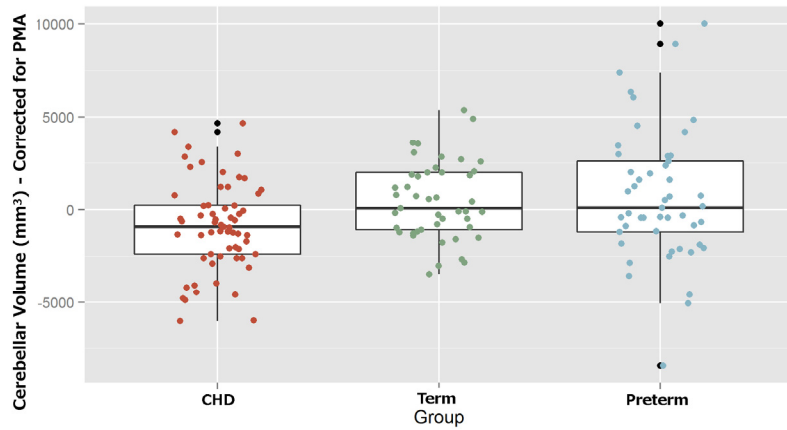

**Figure S2.** Cerebellar volumes (corrected for PMA) at the time of MRI. Volumes were corrected for post-menstrual age (PMA). CHD neonates showed a significantly lower volume when compared with both preterm born neonates and term born controls. No significant difference between the preterm and control groups was noted. ANOVA p-value < 0.002, with pairwise Tukey's HSD: control-preterm:  $p < 0.936$ ; control-CHD:  $p < 0.015$ ; preterm-CHD:  $p < 0.004$ .
